# Supplementary material for: Simultaneously tuning the luminescent color and realizing an optical temperature sensor by negative thermal expansion in Sc2(WO4)3:Tb/Eu phosphors
Source: Royal Society of Chemistry journal article supplement (doi:10.1039/d3dt03162d), 2023-12-01
Supplement: d3dt03162d1.pdf [file d3dt03162d1.pdf]

Supplementary information for  
**Simultaneously tuning luminescent color and realizing optical temperature sensor by negative thermal expansion in Sc<sub>2</sub>(WO<sub>4</sub>)<sub>3</sub>:Tb/Eu phosphors**

Biao Fu<sup>a</sup>, Haokun Yan<sup>a</sup>, Renfu Li<sup>a</sup>, Ziqian Liao<sup>a</sup>, Bao Qiu<sup>\*c</sup>, Guoliang Gong<sup>a</sup>, Haiping Huang<sup>a</sup>, Yijian Sun<sup>a</sup>, He-Rui Wen<sup>a</sup> and Jinsheng Liao<sup>\*a,b</sup>

---

<sup>a</sup> †School of Chemistry and Chemical Engineering/Jiangxi Provincial Key Laboratory of Functional Molecular Materials Chemistry, Jiangxi University of Science and Technology, Ganzhou, Jiangxi, 341000, P.R. China. E-mail address: [jsliao1209@126.com](mailto:jsliao1209@126.com)

<sup>b</sup> National Rare Earth Functional Material Innovation Center, Ganzhou 341000, P.R. China

<sup>c</sup> Ningbo Institute of Materials Technology and Engineering (NIMTE), Chinese Academy of Sciences, Ningbo, Zhejiang, 315201, P. R. China. E-mail address: [qiubao@nimte.ac.cn](mailto:qiubao@nimte.ac.cn)

Table S1 SWO:25%Tb<sup>3+</sup>/3%Eu<sup>3+</sup> phosphor cell parameters and refinement parameters at different temperatures.

| T (K)                  | 298          | 323      | 348      | 373      | 398      | 423      | 448      | 473      |
|------------------------|--------------|----------|----------|----------|----------|----------|----------|----------|
| Crystal system         | Orthorhombic |          |          |          |          |          |          |          |
| Space group            | Pnca (No.60) |          |          |          |          |          |          |          |
|                        | a= 9.747     | 9.782    | 9.778    | 9.777    | 9.776    | 9.774    | 9.772    | 9.770    |
| Lattice parameters (Å) | b= 13.450    | 13.479   | 13.488   | 13.489   | 13.492   | 13.493   | 13.493   | 13.494   |
|                        | c= 9.620     | 9.669    | 9.682    | 9.681    | 9.681    | 9.681    | 9.679    | 9.678    |
| V (Å <sup>3</sup> )    | 1261.152     | 1274.876 | 1276.962 | 1276.795 | 1276.845 | 1276.712 | 1276.097 | 1275.922 |
| R <sub>wp</sub> (%)    | 3.63         | 3.61     | 3.50     | 3.67     | 3.61     | 3.64     | 3.61     | 3.66     |
| R <sub>p</sub> (%)     | 2.66         | 2.55     | 2.48     | 2.56     | 2.52     | 2.56     | 2.53     | 2.58     |
| χ <sup>2</sup>         | 3.221        | 3.198    | 3.021    | 3.311    | 3.211    | 3.253    | 3.208    | 3.290    |

Table S2 Temperature-dependent lifetime of  $\text{Tb}^{3+}$  ( $\tau_{\text{Tb}}$ ) in SWO: 25% $\text{Tb}^{3+}$  and temperature-dependent lifetime of  $\text{Tb}^{3+}$  and  $\text{Eu}^{3+}$  ( $\tau_{\text{Eu}}$ ) in SWO:25% $\text{Tb}^{3+}$ /3% $\text{Eu}^{3+}$

| T (K)                                                                                  | 298 | 323 | 348  | 373  | 398  | 423  | 448  | 473  |
|----------------------------------------------------------------------------------------|-----|-----|------|------|------|------|------|------|
| $\tau_{\text{Tb}}$ of SWO: 25% $\text{Tb}^{3+}$ ( $\mu\text{s}$ )                      | 876 | 905 | 1104 | 1415 | 1409 | 1411 | 1394 | 1373 |
| $\tau_{\text{Tb}}$ of SWO: 25% $\text{Tb}^{3+}$ /3% $\text{Eu}^{3+}$ ( $\mu\text{s}$ ) | 285 | 264 | 264  | 131  | 120  | 98   | 84   | 88   |
| $\tau_{\text{Eu}}$ of SWO:25% $\text{Tb}^{3+}$ /3% $\text{Eu}^{3+}$ ( $\mu\text{s}$ )  | 683 | 749 | 782  | 625  | 671  | 695  | 707  | 703  |

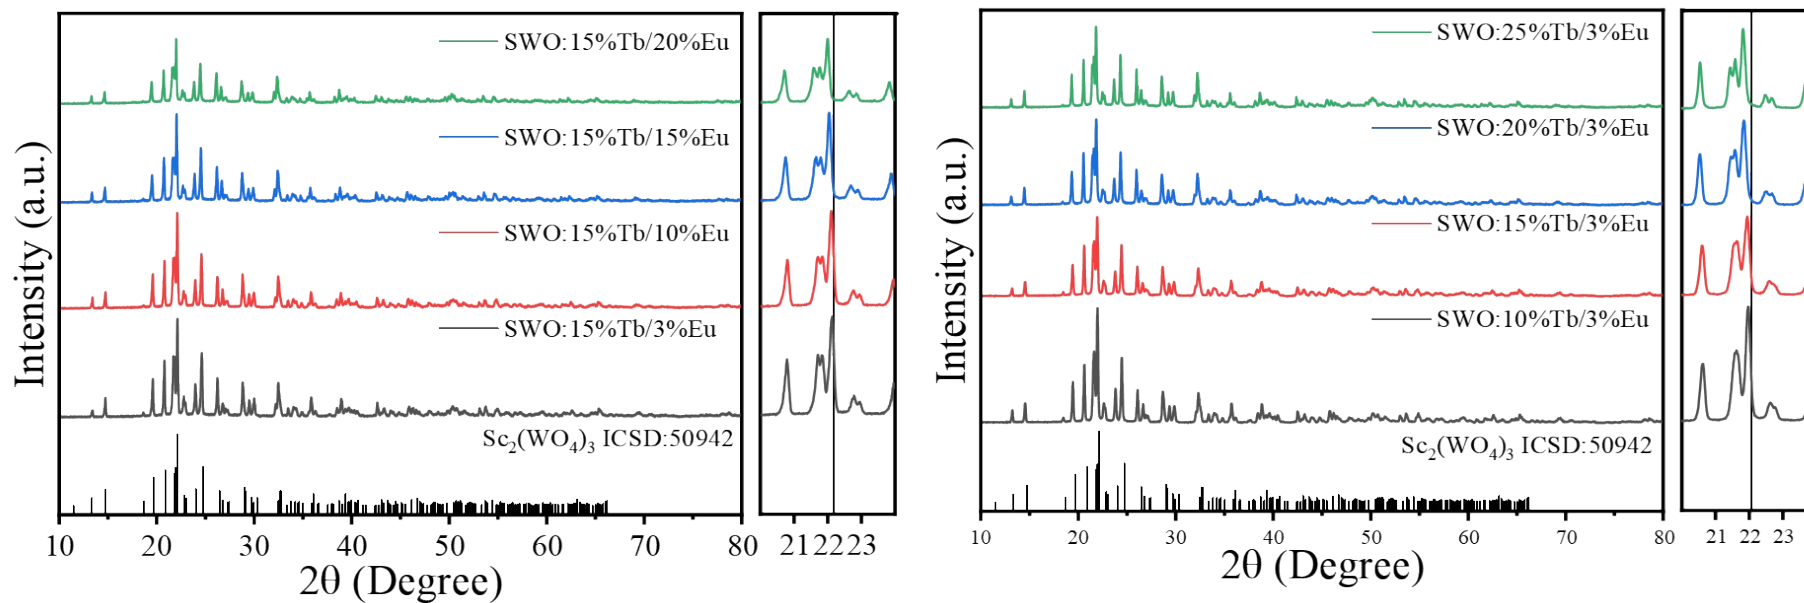

**Fig. S1** XRD patterns of SWO:xTb/yEu phosphors with different Tb<sup>3+</sup>/Eu<sup>3+</sup> concentrations at room temperature.

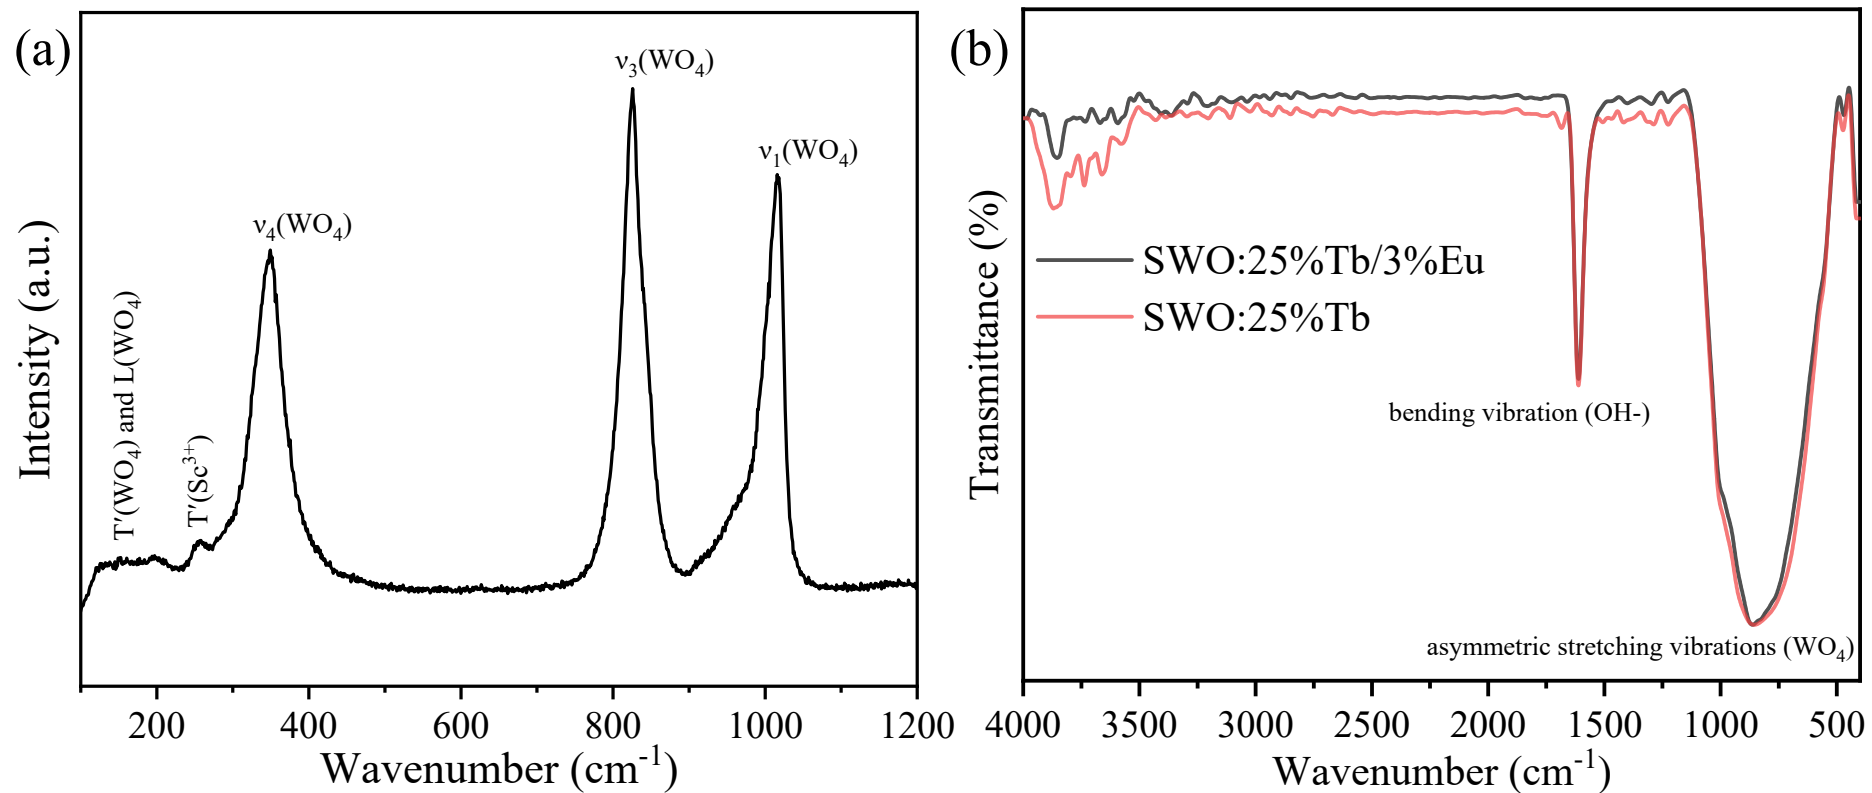

Fig. S2 (a) Raman spectrum of SWO:25Tb%/3%Eu and (b) FT-IR spectra of SWO:25Tb% and SWO:25%Tb/3%Eu

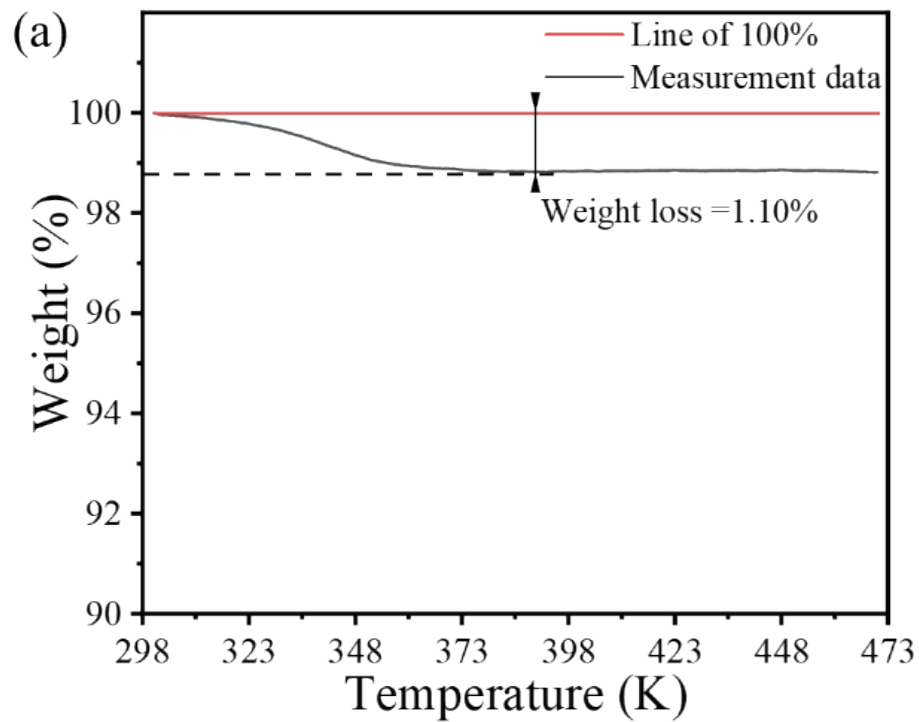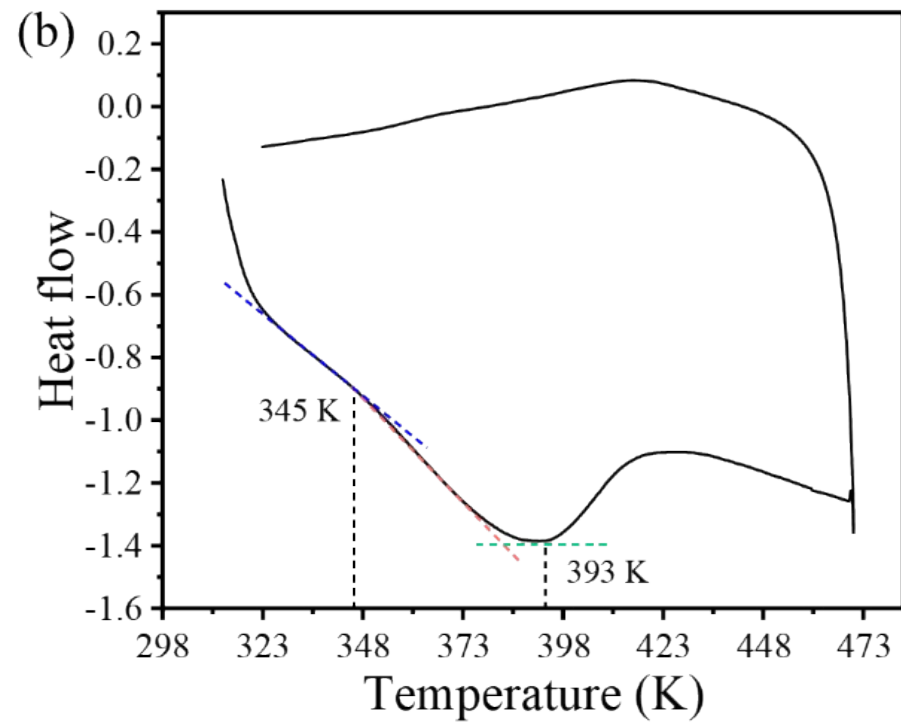

**Fig. S3** (a) TG and (b) DSC curves of SWO:25%Tb/3%Eu phosphors.

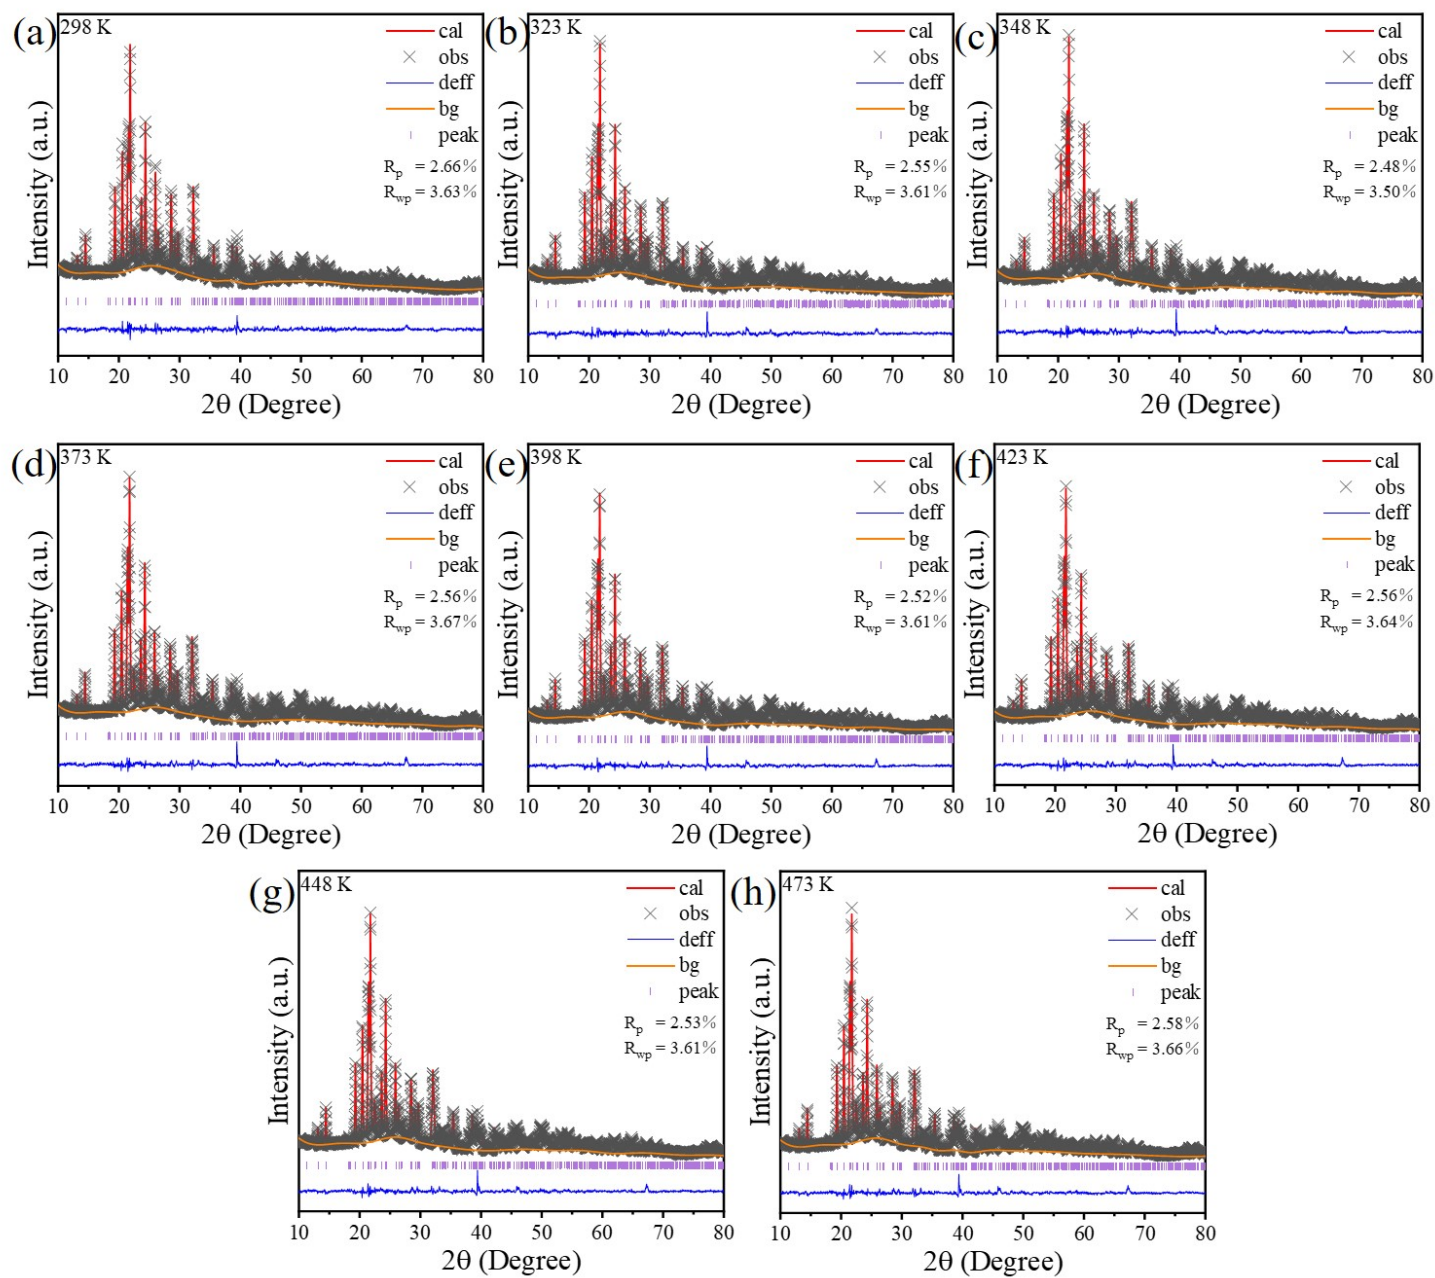

**Fig. S4** The Rietveld refinement of the XRD pattern of the SWO:25%Tb/3%Eu phosphor for different temperature.

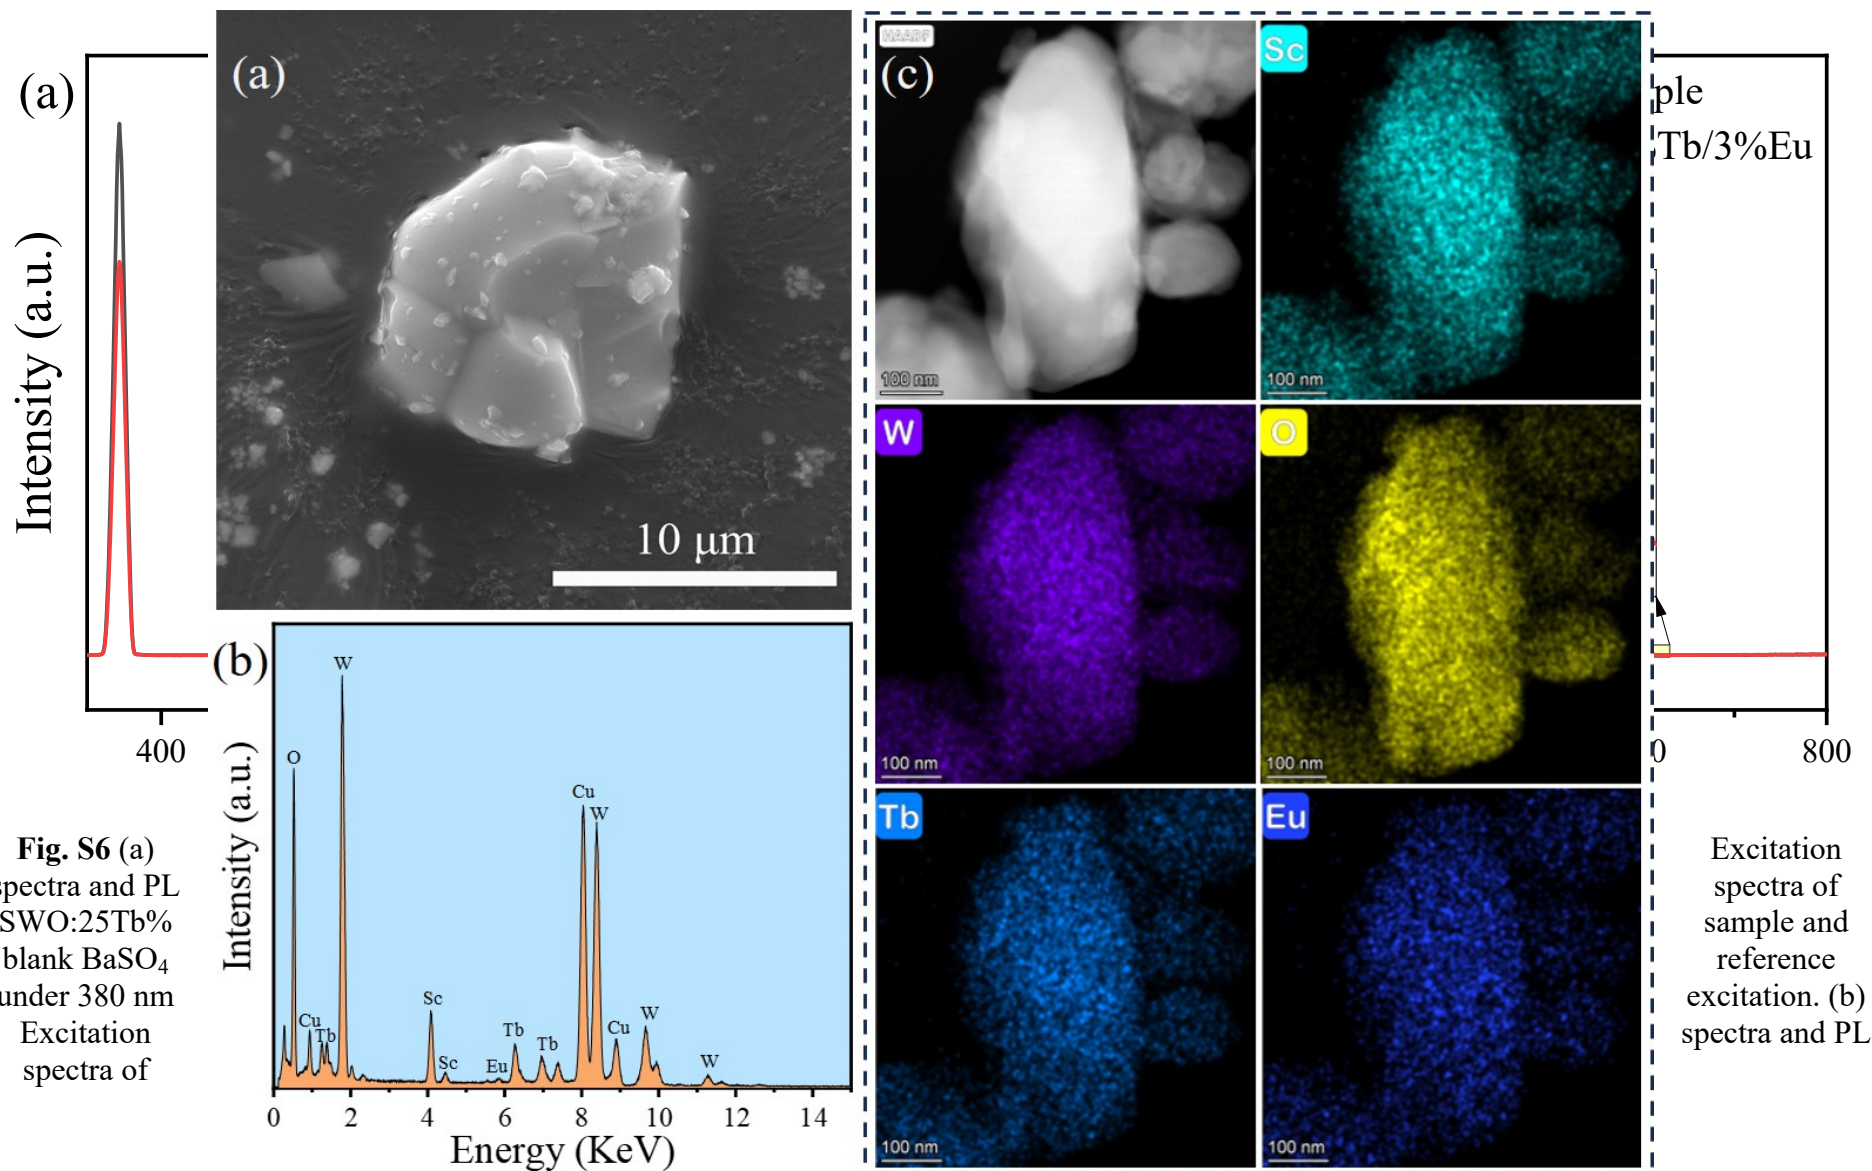

**Fig. S6** (a) spectra and PL SWO:25Tb% blank BaSO<sub>4</sub> under 380 nm Excitation spectra of

**Fig. S5** (a) SEM image, (b) EDS spectrum (copper was plated on the surface of the sample to enhance conductivity) and (c) HR-STEM image and corresponding elemental mapping of SWO:25%Tb/3%Eu sample.

SWO:25%Tb/3%Eu sample and blank BaSO<sub>4</sub> reference under 380 nm excitation



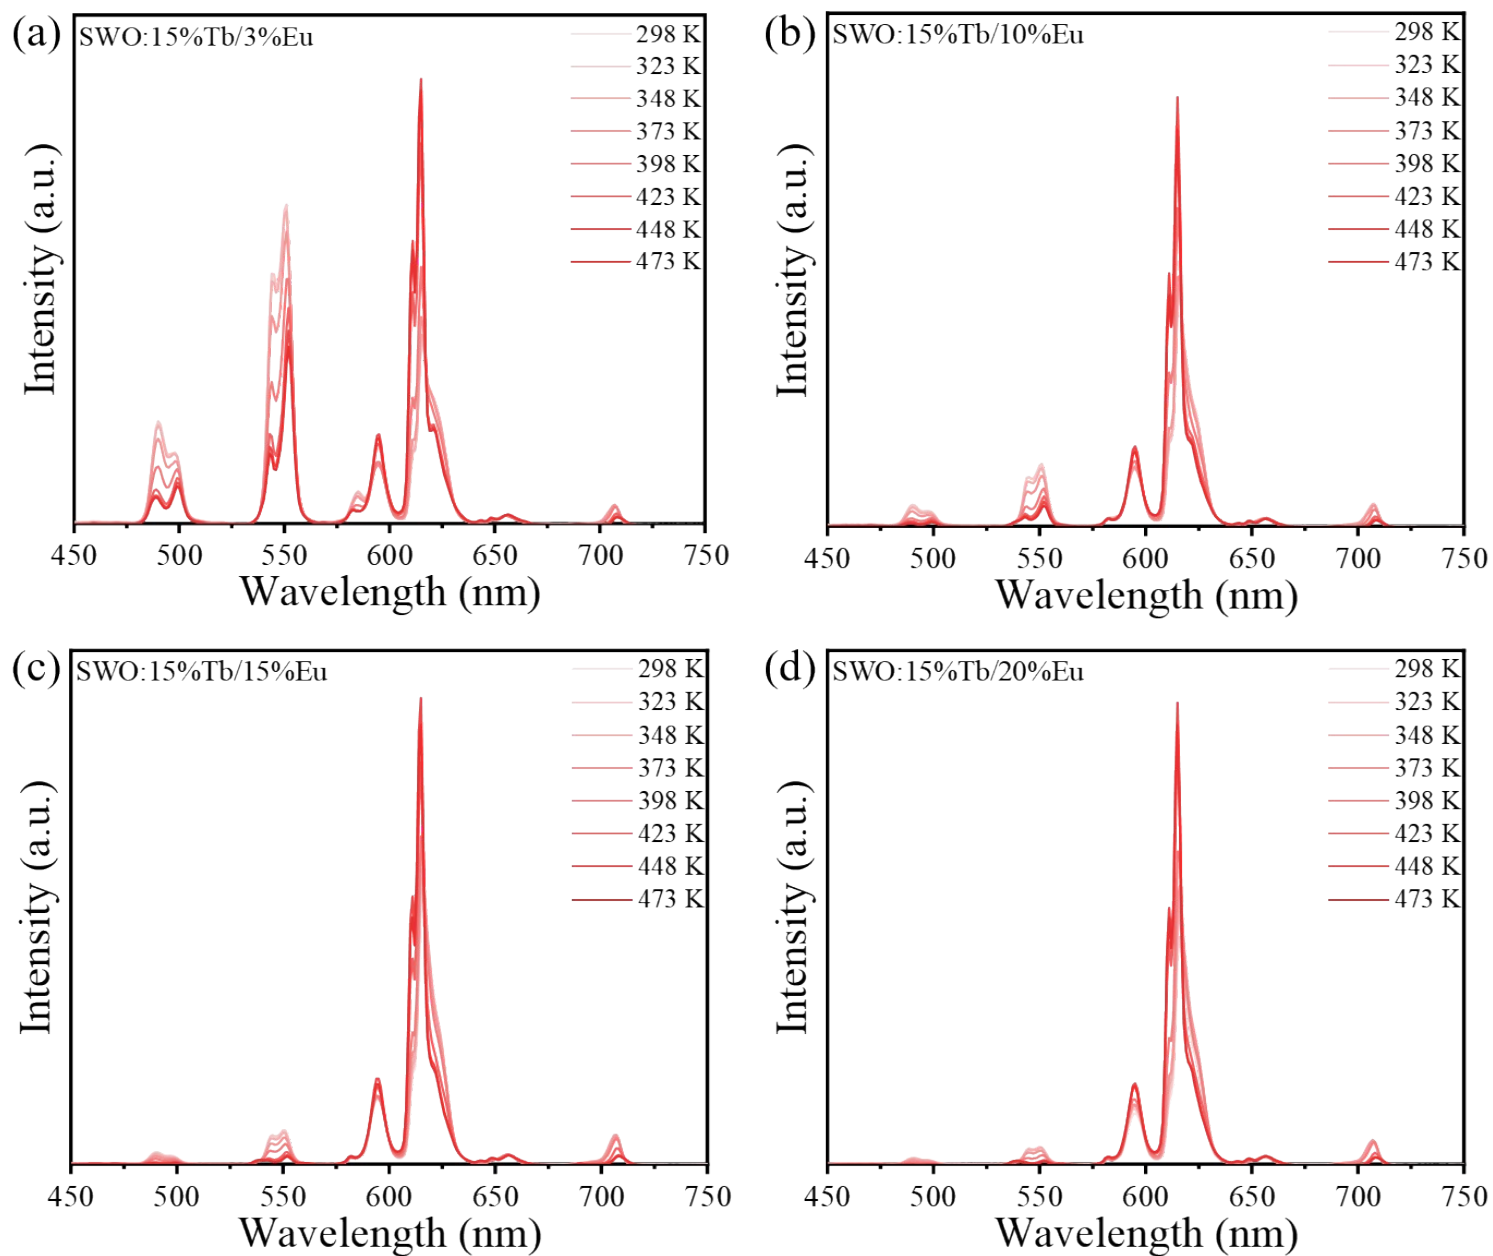

**Fig. S7** Temperature-dependent DS emission spectra SWO:15%Tb/yEu phosphors variation with temperature.

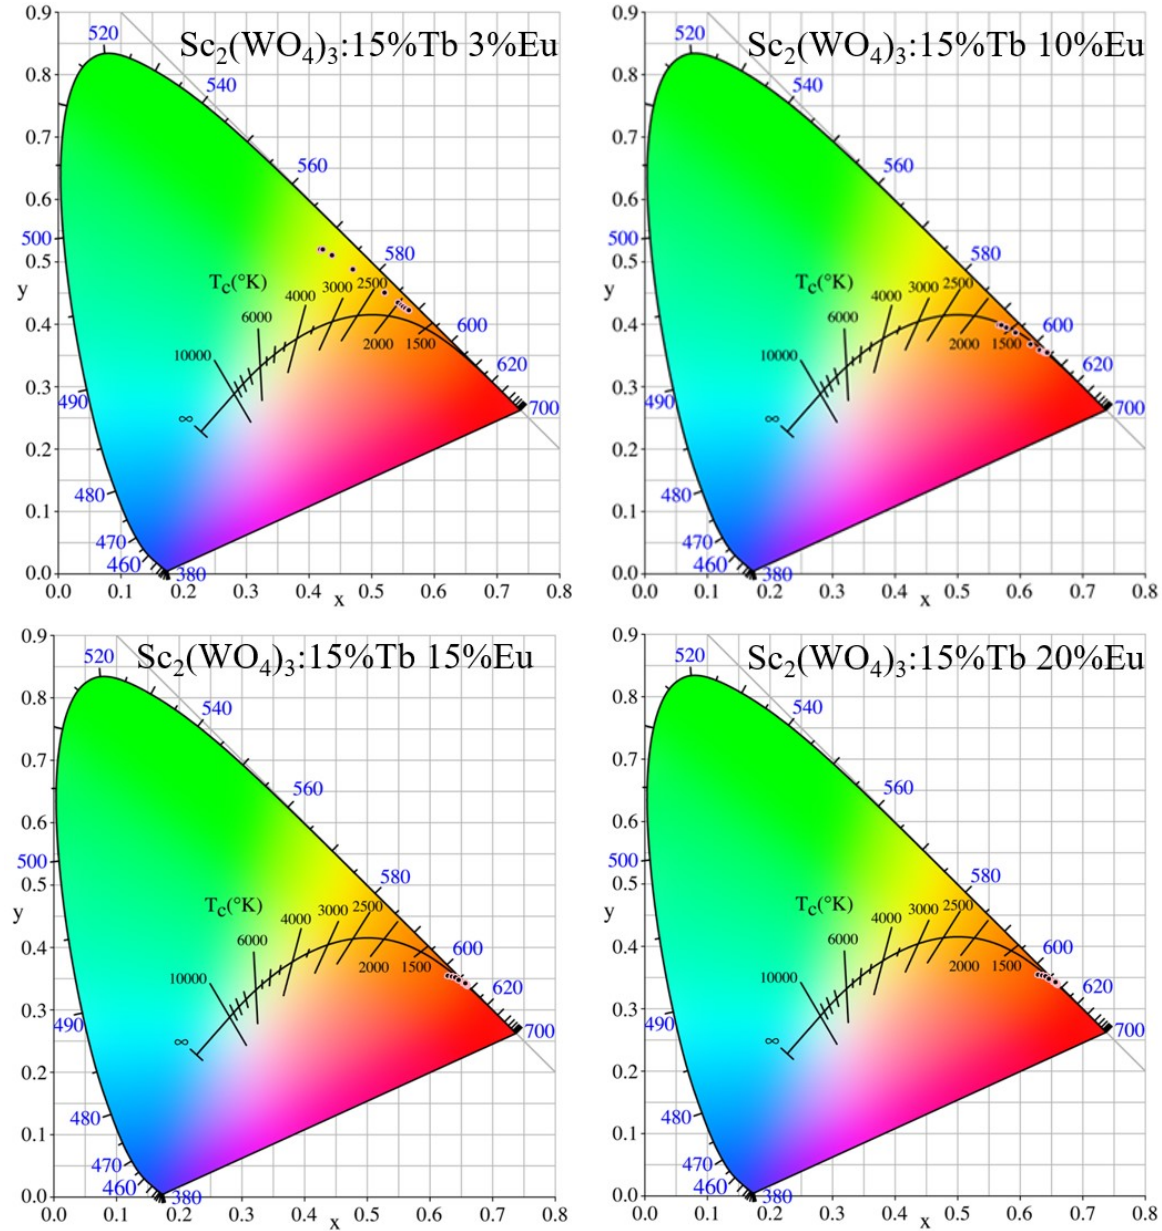

**Fig. S8** CIE chromaticity coordinates of SWO:15%Tb/yEu phosphors variation with temperature.

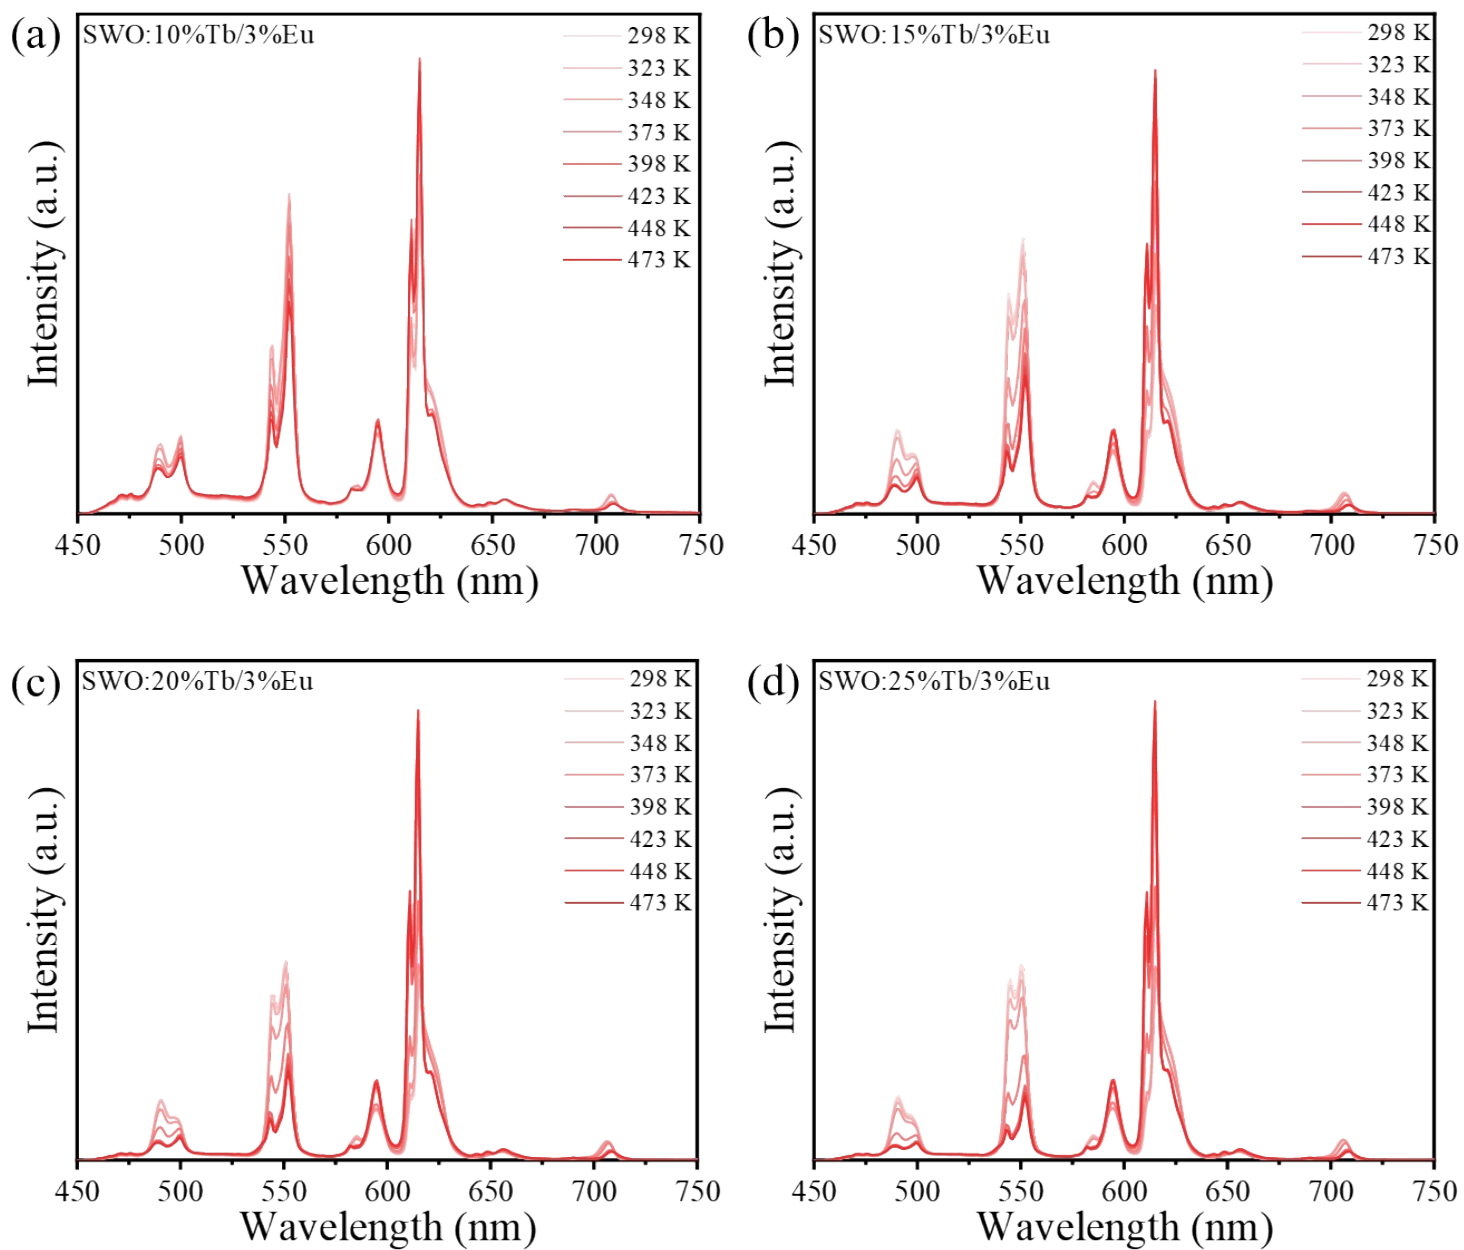

**Fig. S9** Temperature-dependent DS emission spectra SWO:xTb/3%Eu phosphors variation with temperature.

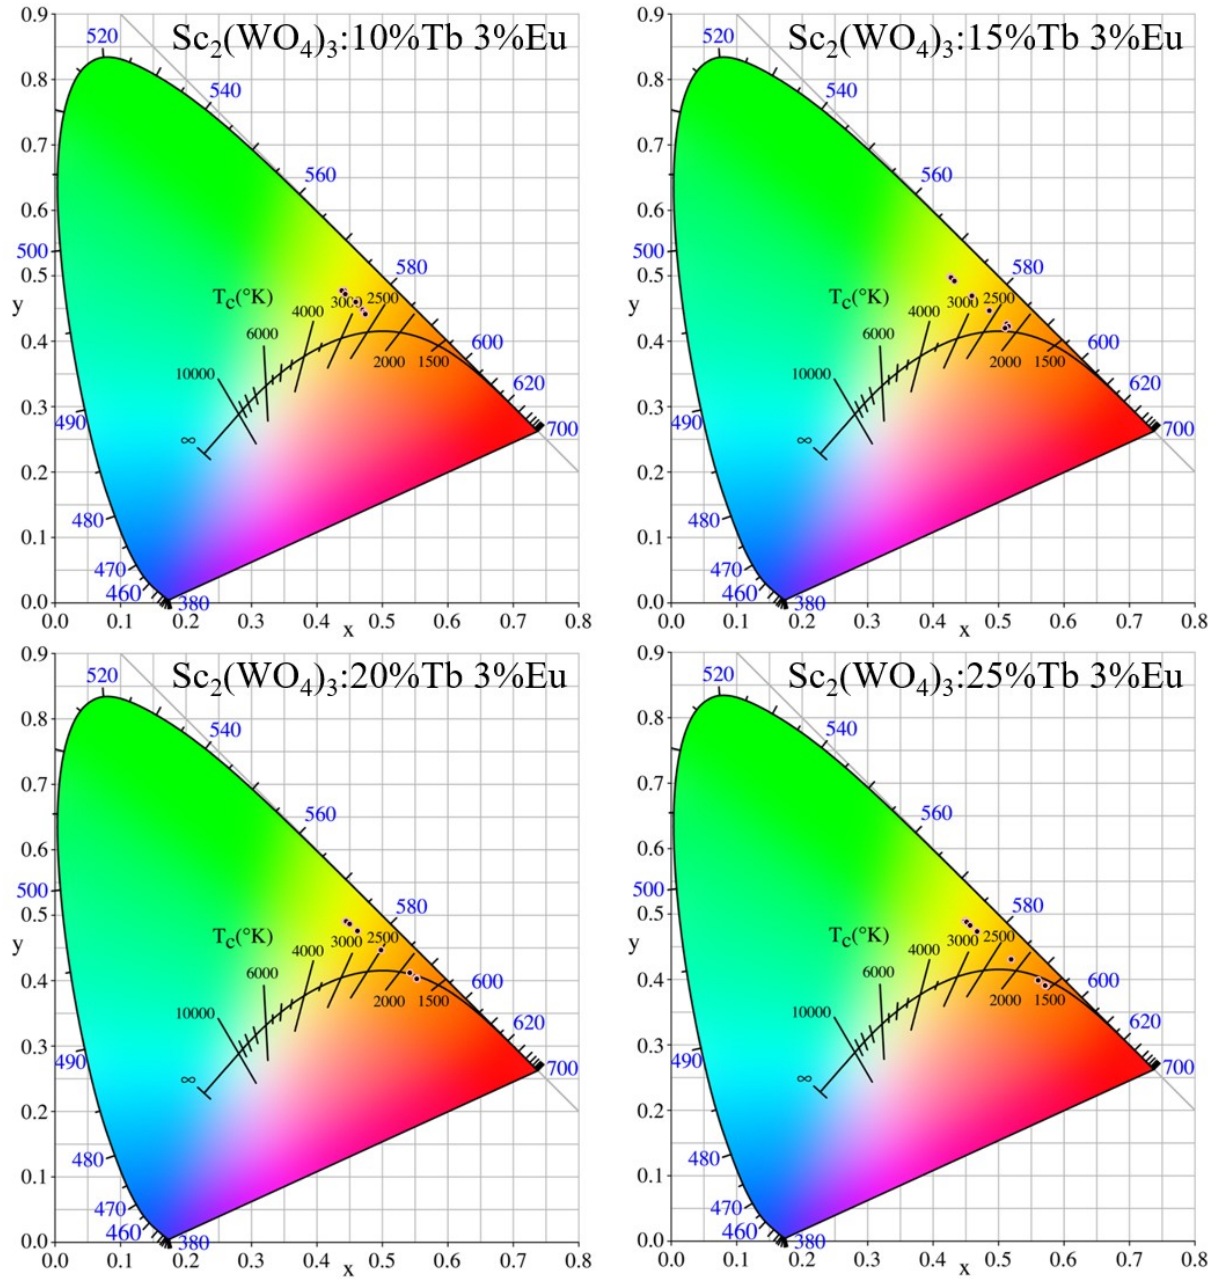

**Fig. S10** CIE chromaticity coordinates of  $\text{SWO}:x\text{Tb}/3\%\text{Eu}$  phosphors variation with temperature.

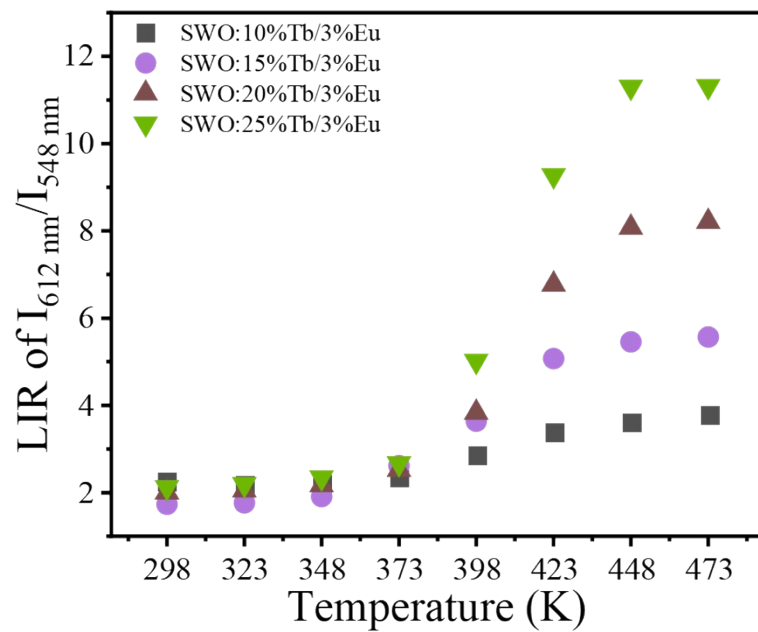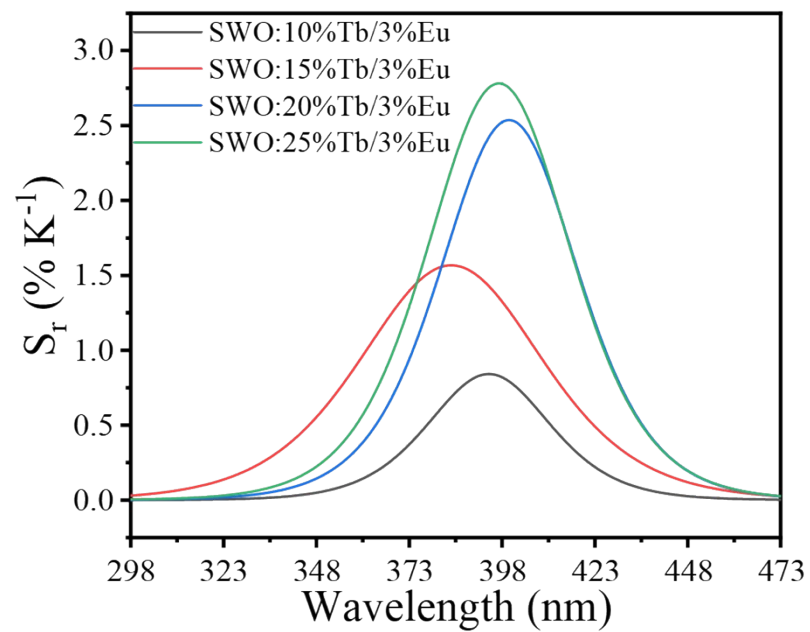

**Fig. S11** LIR and  $S_r$  of SWO:xTb/3%Eu phosphors.

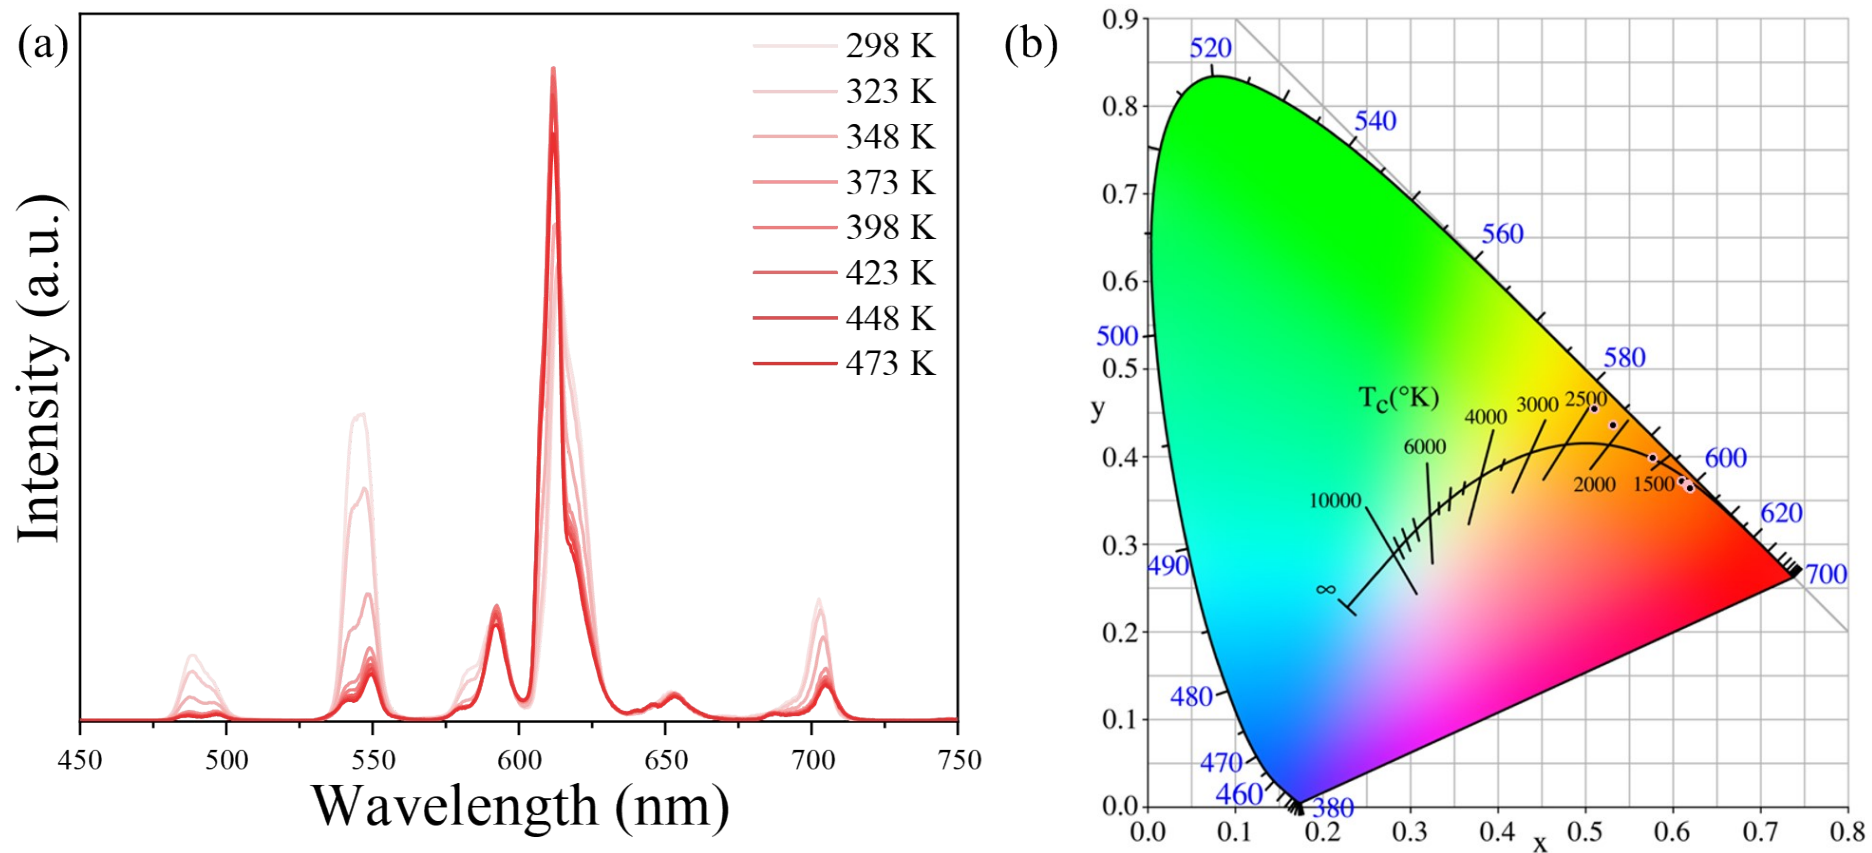

**Fig. S12** Temperature-dependent DS emission spectra and CIE chromaticity coordinates of SWO:25%Tb/3%Eu phosphors.



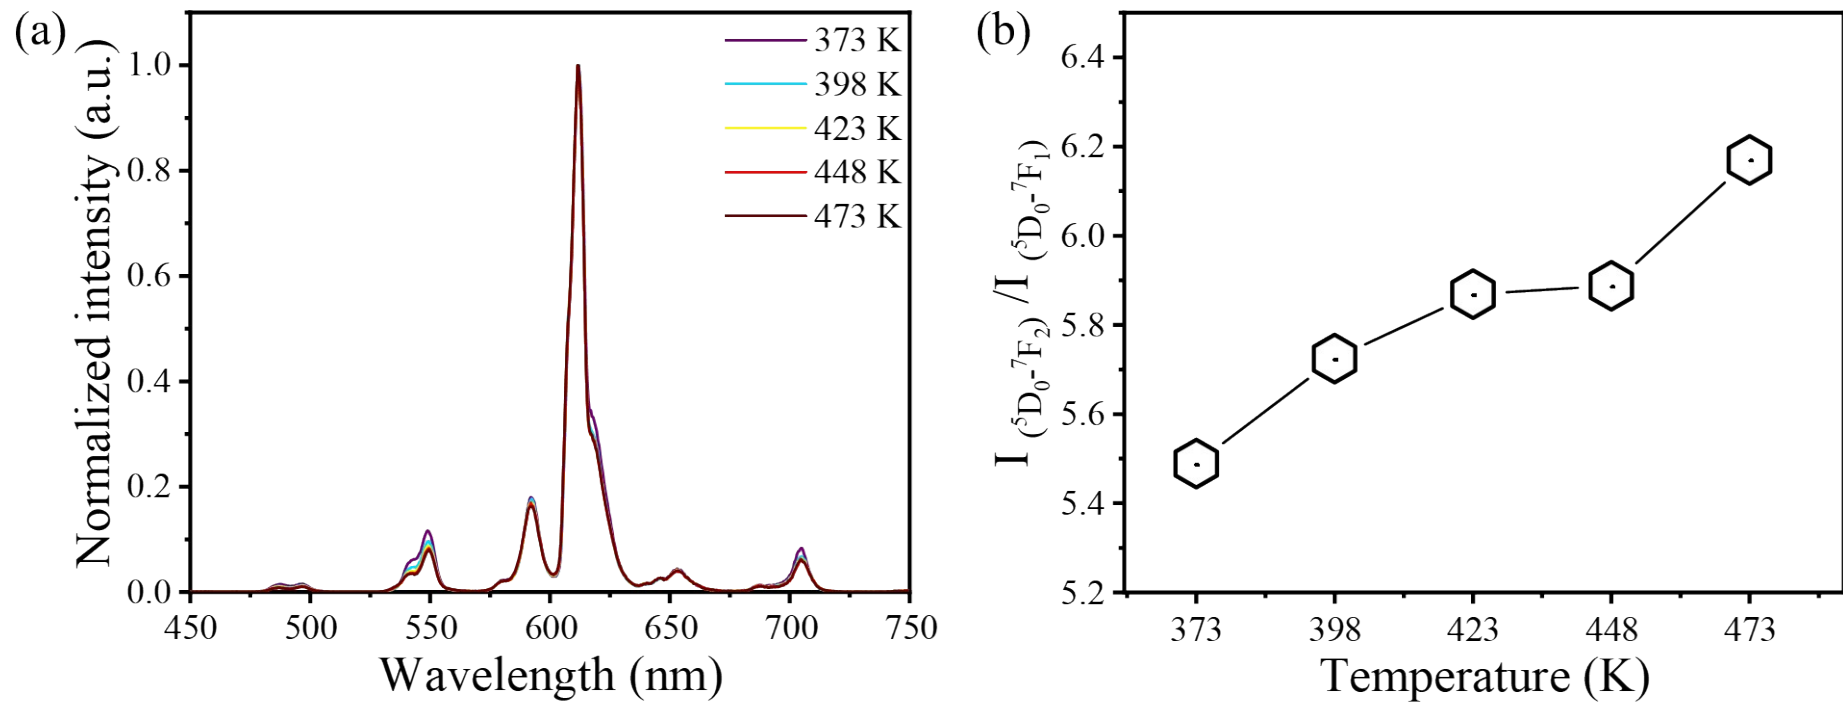

**Fig. S13** (a) Normalized emission spectra of SWO:25%Tb/3%Eu and (b) ratio of line strengths for electric and magnetic dipole transitions of  $\text{Eu}^{3+}$ (612 nm/593 nm) within the temperature from 298 to 473 K.
